# Supplementary material for: Unravelling the sensing efficacy of graphene oxide towards hazardous volatile organic compounds in the polyurethane industry
Source: Royal Society of Chemistry journal article supplement (doi:10.1039/d3nj03762b), 2024-01-01
Supplement: d3nj03762b1.pdf [file d3nj03762b1.pdf]

# Unravelling the sensing efficacy of graphene oxide towards hazardous volatile organic compounds in polyurethane industry

Levin Joseph Bernardshaw <sup>a</sup>, Priya Ranjan Dev <sup>b</sup>, Rajadurai Vijay Solomon <sup>b,\*</sup>, Paul Wilson <sup>b,#</sup>

<sup>a</sup>Department of Chemistry, Loyola College (Autonomous) [Affiliated to University of Madras], Chennai – 600 034, India

<sup>b</sup>Department of Chemistry, Madras Christian College (Autonomous), [Affiliated to University of Madras], Chennai – 600 059, India

[\\*vjsolo@mcc.edu.in](mailto:vjsolo@mcc.edu.in)

[#wilson@mcc.edu.in](mailto:wilson@mcc.edu.in)

## Supporting information

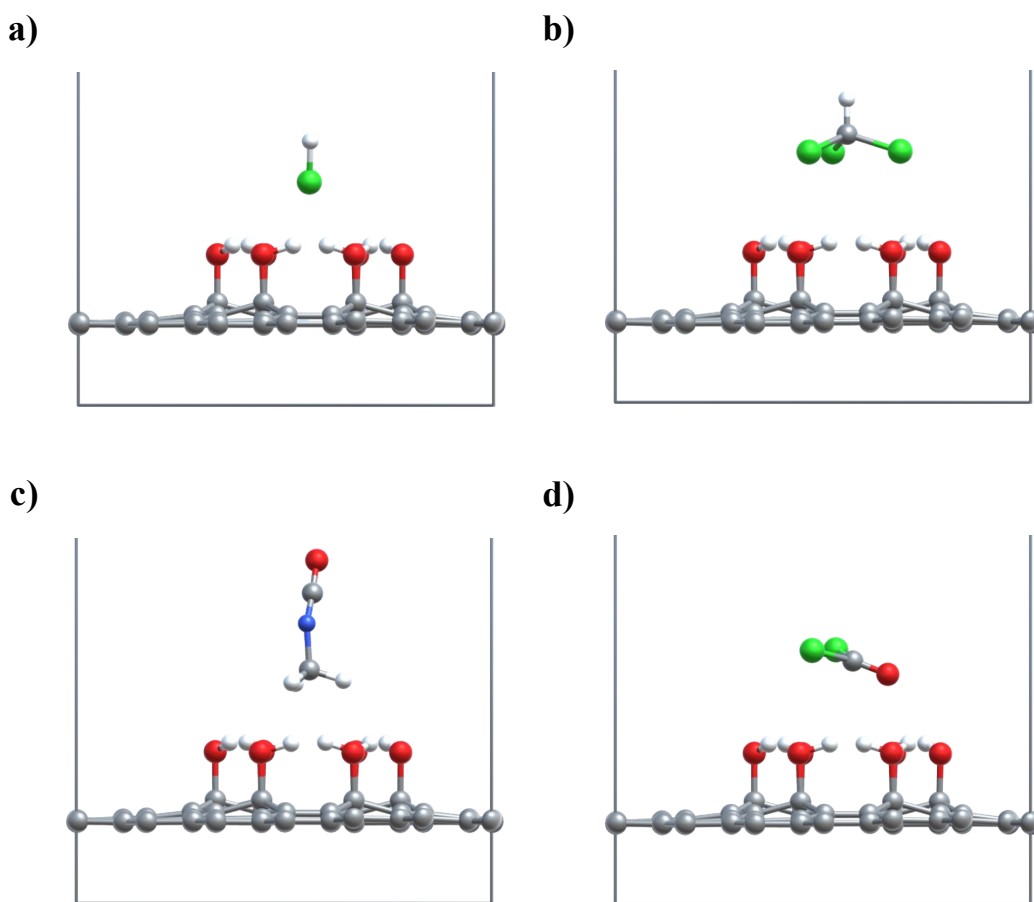

**Figure S1.** Geometry optimized adsorbed orientations of a) HCl, b) TCM, c) MIC, and d) PhG analytes placed above the hexahydroxyl ring system

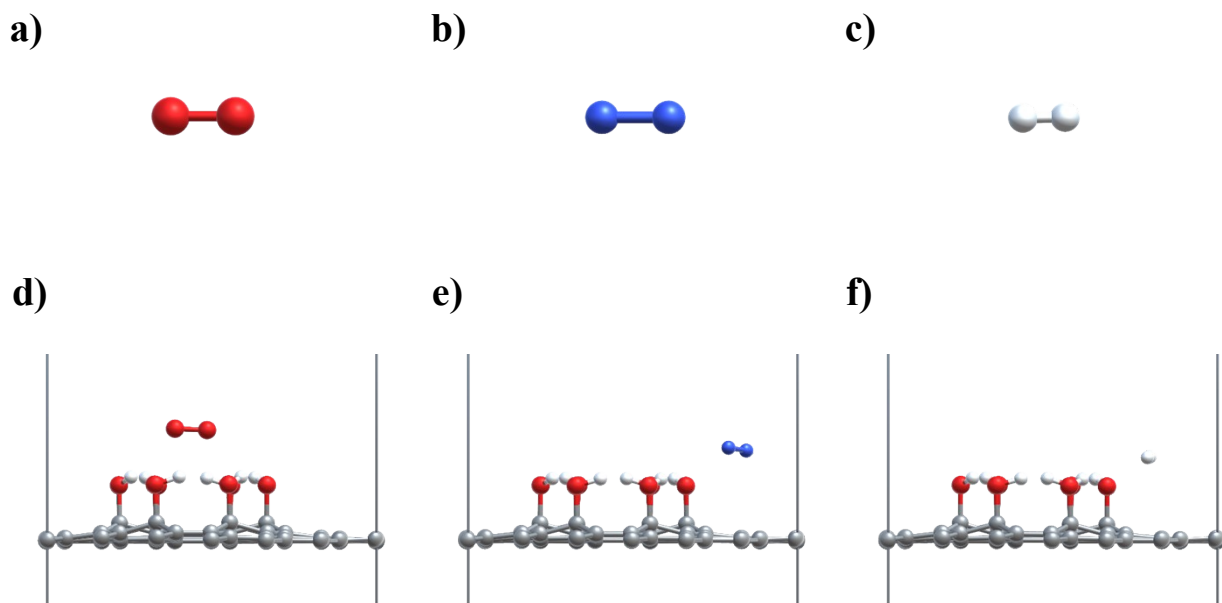

**Figure S2.** Optimized structures of a) O<sub>2</sub>, b) N<sub>2</sub>, and c) H<sub>2</sub> and their most stable adsorbed conformations represented under d) GO-O<sub>2</sub>, e) GO-N<sub>2</sub>, and f) GO-H<sub>2</sub>, respectively

**Table S1.** Computed adsorption energies (in eV) of O<sub>2</sub>, N<sub>2</sub>, and H<sub>2</sub> adsorbed onto GO slab and its corresponding shortest interaction distance (in Å)

| Adsorbed slab     | $E_{ads}$                         |                                 |
|-------------------|-----------------------------------|---------------------------------|
|                   | VOCs placed outside hydroxyl core | VOCs placed above hydroxyl core |
| GO-O <sub>2</sub> | -0.20                             | -0.22                           |
| GO-N <sub>2</sub> | -0.12                             | -0.10                           |
| GO-H <sub>2</sub> | -0.08                             | -0.06                           |
